# Supplementary material for: Hypothyroidism and the risk of breast cancer recurrence and all-cause mortality - a Danish population-based study
Source: Springer Nature journal article supplement (doi:10.1186/s13058-019-1122-3), 2019-03-22
Supplement: MOESM2 [file 16571142]

## ADDITIONAL FILE 2: Sensitivity analyses

In the sensitivity analyses, we performed the main analysis without adjusting for any of the treatment modalities chemotherapy, radiotherapy and surgery. As seen in the Table, these new results show similar results to the main analyses.

|                          | RECURRENCE – presented in the paper          |                     |                    |                  |                  | Without adjustment<br>for treatment<br>modalities |
|--------------------------|----------------------------------------------|---------------------|--------------------|------------------|------------------|---------------------------------------------------|
|                          | Women with<br>breast cancer                  | Recurrent<br>events | Follow-<br>up time | HR (95% CI)      |                  |                                                   |
|                          | Counts (%)                                   | Counts (%)          | (Years)            | Crude            | Adjusted         | Adjusted                                          |
| <b>PREVALENT MODEL</b>   |                                              |                     |                    |                  |                  |                                                   |
| Normal thyroid           | 34 191 (96)                                  | 5 626 (97)          | 20 288             | 1.00             | 1.00             | 1.00                                              |
| Prevalent hypothyroidism | 1 272 (4)                                    | 184 (3)             | 594                | 0.94 (0.81-1.09) | 1.01 (0.87-1.19) | 1.00 (0.85-1.16)                                  |
| <b>INCIDENT MODEL</b>    |                                              |                     |                    |                  |                  |                                                   |
| Normal thyroid           | 33 332 (97)                                  | 5 547 (99)          | 20 075             | 1.00             | 1.00             | 1.00                                              |
| Incident hypothyroidism  | 859 (3)                                      | 79 (1)              | 213                | 1.00 (0.80-1.24) | 0.93 (0.75-1.16) | 0.92 (0.74-1.15)                                  |
|                          | ALL-CAUSE MORTALITY – presented in the paper |                     |                    |                  |                  | Without treatment<br>modalities                   |
|                          | Women with<br>breast cancer                  | Recurrent<br>events | Follow-<br>up time | HR (95% CI)      |                  |                                                   |
|                          | Counts (%)                                   | Counts (%)          | (Years)            | Crude            | Adjusted         | Adjusted                                          |
| <b>PREVALENT MODEL</b>   |                                              |                     |                    |                  |                  |                                                   |
| Normal thyroid           | 34 225 (96)                                  | 9 696 (96)          | 36 907             | 1.00             | 1.00             | 1.00                                              |
| Incident hypothyroidism  | 1 273 (4)                                    | 398 (4)             | 1 555              | 1.25 (1.13-1.39) | 1.02 (0.92-1.14) | 1.01 (0.90-1.12)                                  |
| <b>INCIDENT MODEL</b>    |                                              |                     |                    |                  |                  |                                                   |
| Normal thyroid           | 32 827 (96)                                  | 9 422 (97)          | 36 599             | 1.00             | 1.00             | 1.00                                              |
| Incident hypothyroidism  | 1 398 (4)                                    | 274 (3)             | 307                | 1.15 (1.02-1.30) | 1.08 (0.95-1.23) | 1.08 (0.94-1.22)                                  |
